# Supplementary material for: Rapid controllable high-concentration synthesis and mutual attachment of silver nanowires
Source: Royal Society of Chemistry journal article supplement (doi:10.1039/c2ra01162j), 2012-01-01
Supplement: c2ra01162j.pdf [file c2ra01162j.pdf]

## Supporting Information

# Rapid controllable high-concentration synthesis and mutual attachment of silver nanowires

Mingjun Hu, Jiefeng Gao, Yucheng Dong, Shiliu Yang, Robert K. Y. Li\*

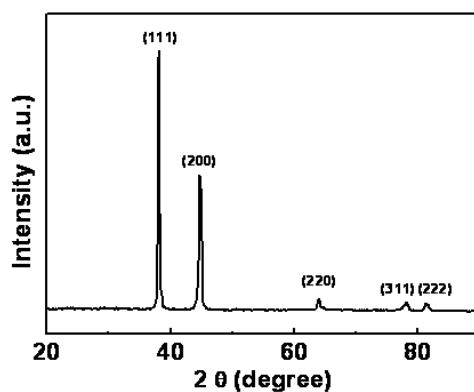

Fig. S1 XRD pattern of as-prepared typical silver nanowires.

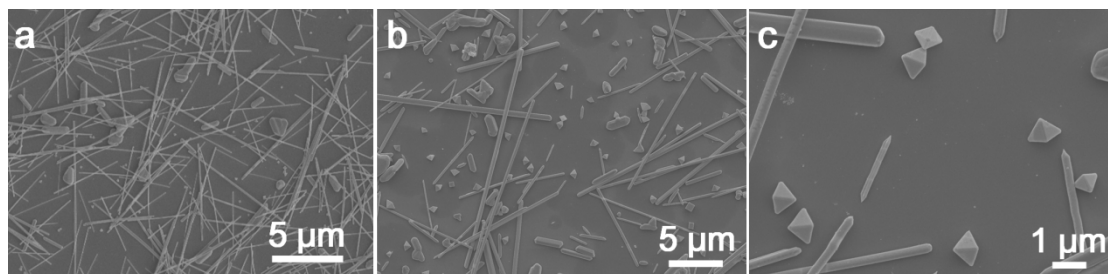

Fig. S2 SEM images of silver nanoproducts without the introduction of the fast injection step but with different injection time, a) 10mins; b,c) 20mins.

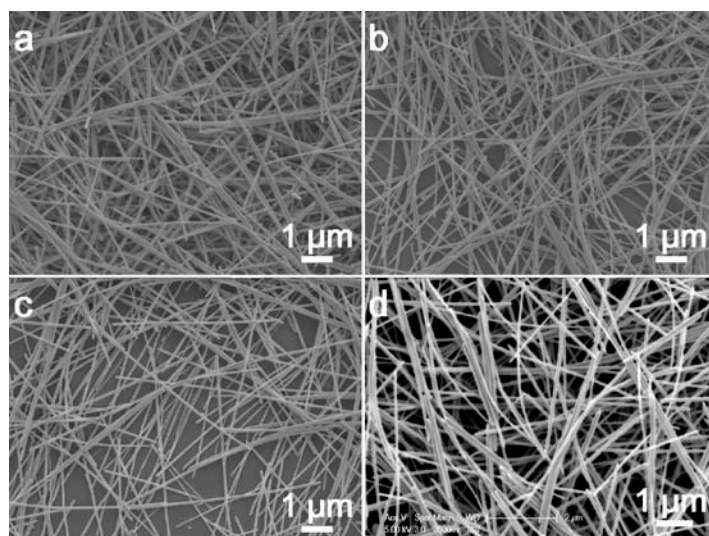

Fig. S3 SEM images of silver nanowires under different temperature, a) 140°C; b) 150°C; c) 160°C; d) 170°C.  $C_{\text{AgNO}_3}=0.15\text{M}$

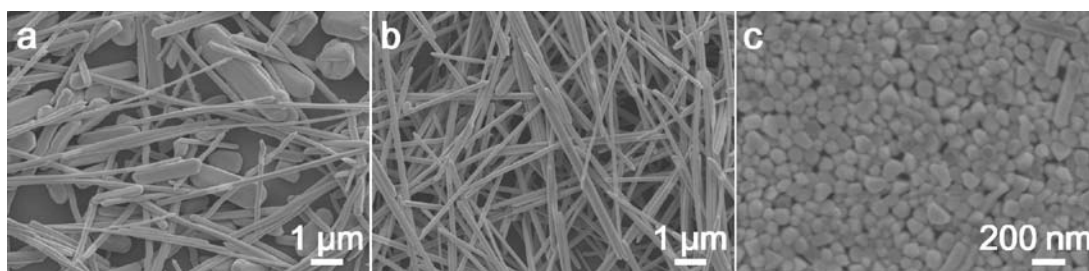

Fig. S4 SEM images of silver products in the fast injection synthesis with different molar ratios of PVP to  $\text{AgNO}_3$ , a) 1.5:1; b) 3:1; c) 4.5:1.  $V_{\text{EG}}=40\text{ml}$ ,  $C_{\text{AgNO}_3}=0.15\text{M}$ .

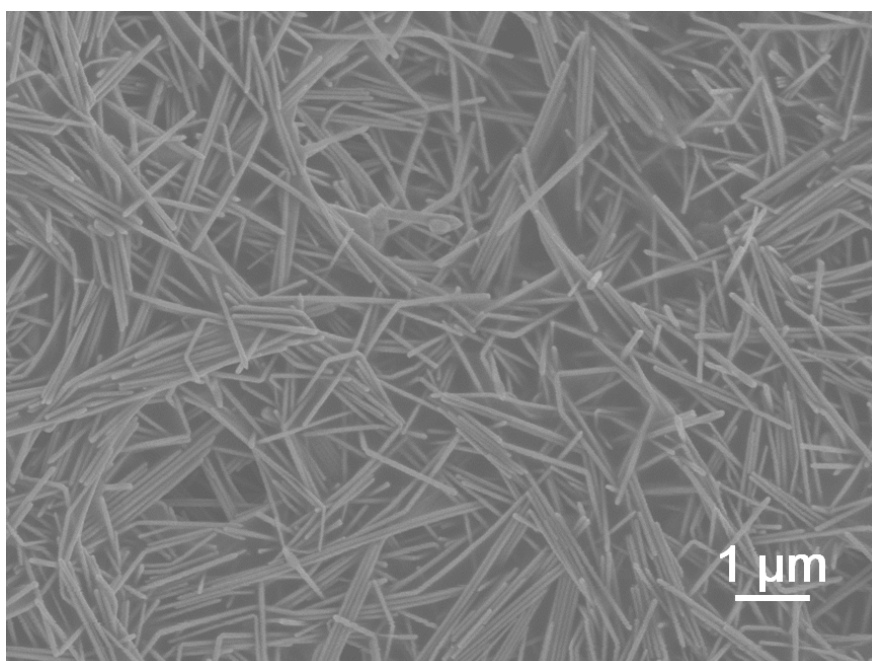

Fig. S5 SEM images of curved silver nanowires in high-concentration synthesis.
